# Supplementary material
Source: PubMed Central journal article supplement (PMC3813564)
Supplement: cbt-14-481-s01.pdf [file cbt-14-481-s01.pdf]

## **Supplemental Material to:**

**Mari lida, Toni M. Brand, David A. Campbell, Megan M. Starr, Neha Luthar, Anne M. Traynor and Deric L. Wheeler**

**Targeting AKT with the allosteric AKT inhibitor MK-2206 in non-small cell lung cancer cells with acquired resistance to cetuximab**

**Cancer Biology & Therapy 2013; 14(6)**

**<http://dx.doi.org/10.4161/cbt.24342>**

**<http://www.landesbioscience.com/journals/cbt/article/24342/>**

## **Supplemental data**

**Table 1:** Phosphorylation levels of AKT substrate proteins in HC4 cells vs HP cells and HC4 cells treated with MK-2206 vs vehicle control.

| Protein List                           | HC4 vs HP |
|----------------------------------------|-----------|
| 4E-BP1(Ab-36)                          | 0.90      |
| 4E-BP1(Ab-45)                          | 0.89      |
| 4E-BP1(Phospho-Thr36)                  | 1.14      |
| 4E-BP1(Phospho-Thr45)                  | 1.26      |
| AFX(Ab-197)                            | 0.99      |
| AFX(Phospho-Ser197)                    | 1.02      |
| Akt(Ab-308)                            | 0.82      |
| Akt(Ab-473)                            | 0.89      |
| Akt(Phospho-Ser473)                    | 1.52      |
| Akt(Phospho-Thr308)                    | 1.55      |
| Akt2(Ab-474)                           | 0.89      |
| Akt2(Phospho-Ser474)                   | 0.82      |
| ASK1(Ab-83)                            | 0.91      |
| ASK1(Ab-966)                           | 0.65      |
| ASK1(Phospho-Ser83)                    | 1.13      |
| ASK1(Phospho-Ser966)                   | 1.19      |
| BAD(Ab-112)                            | 0.95      |
| BAD(Ab-136)                            | 1.00      |
| BAD(Ab-155)                            | 1.07      |
| BAD(Phospho-Ser112)                    | 1.02      |
| BAD(Phospho-Ser136)                    | 0.99      |
| BAD(Phospho-Ser155)                    | 1.39      |
| BCL-2(Ab-56)                           | 0.94      |
| BCL-2(Ab-70)                           | 1.01      |
| BCL-2(Phospho-Ser70)                   | 1.00      |
| BCL-2(Phospho-Thr56)                   | 0.97      |
| BCL-XL(Ab-62)                          | 1.06      |
| BCL-XL(Phospho-Ser62)                  | 0.91      |
| Beta Actin                             | 0.77      |
| c-Jun (Phospho-Thr239)                 | 0.85      |
| c-Jun(Ab-170)                          | 1.01      |
| c-Jun(Ab-239)                          | 0.89      |
| c-Jun(Ab-243)                          | 0.89      |
| c-Jun(Ab-63)                           | 0.98      |
| c-Jun(Ab-73)                           | 0.96      |
| c-Jun(Ab-91)                           | 1.02      |
| c-Jun(Ab-93)                           | 0.68      |
| c-Jun(Phospho-Ser243)                  | 0.90      |
| c-Jun(Phospho-Ser63)                   | 1.29      |
| c-Jun(Phospho-Ser73)                   | 1.10      |
| c-Jun(Phospho-Thr91)                   | 1.13      |
| c-Jun(Phospho-Thr93)                   | 1.14      |
| c-Jun(Phospho-Tyr170)                  | 1.45      |
| c-Kit(Ab-721)                          | 0.99      |
| c-Kit(Phospho-Tyr721)                  | 1.12      |
| elF4E(Ab-209)                          | 1.07      |
| elF4E(Phospho-Ser209)                  | 1.33      |
| FAK(Ab-397)                            | 0.99      |
| FAK(Ab-861)                            | 1.16      |
| FAK(Ab-925)                            | 0.93      |
| FAK(Phospho-Tyr861)                    | 1.33      |
| FAK(Phospho-Tyr925)                    | 1.34      |
| FKHR(Ab-256)                           | 0.77      |
| FKHR(Ab-319)                           | 0.95      |
| FKHR(Phospho-Ser256)                   | 1.05      |
| FKHR(Phospho-Ser319)                   | 1.12      |
| FKHRL1(Ab-253)                         | 0.84      |
| FKHRL1(Phospho-Ser253)                 | 1.16      |
| Gab1(Ab-627)                           | 0.87      |
| Gab1(Phospho-Tyr627)                   | 0.88      |
| GAPDH                                  | 0.89      |
| GSK3 alpha(Ab-21)                      | 1.05      |
| GSK3 alpha(Phospho-Ser21)              | 0.98      |
| GSK3 beta(Ab-9)                        | 0.96      |
| GSK3 beta(Phospho-Ser9)                | 1.16      |
| IKB-alpha(Ab-32/36)                    | 0.98      |
| IKB-alpha(Ab-42)                       | 0.83      |
| IKB-alpha(Phospho-Ser32/Phospho-Ser36) | 0.98      |
| IKB-alpha (Phospho-Tyr42)              | 1.19      |
| IKK alpha(Ab-23)                       | 0.94      |

| Protein List                           | HC4<br>2.5 uM MK2206 vs Vehicle control |
|----------------------------------------|-----------------------------------------|
| 4E-BP1(Ab-36)                          | 1.03                                    |
| 4E-BP1(Ab-45)                          | 0.86                                    |
| 4E-BP1(Phospho-Thr36)                  | 0.90                                    |
| 4E-BP1(Phospho-Thr45)                  | 0.85                                    |
| AFX(Ab-197)                            | 0.84                                    |
| AFX(Phospho-Ser197)                    | 0.92                                    |
| Akt(Ab-308)                            | 1.42                                    |
| Akt(Ab-473)                            | 1.35                                    |
| Akt(Phospho-Ser473)                    | 0.80                                    |
| Akt(Phospho-Thr308)                    | 0.88                                    |
| Akt2(Ab-474)                           | 1.05                                    |
| Akt2(Phospho-Ser474)                   | 0.79                                    |
| ASK1(Ab-83)                            | 1.05                                    |
| ASK1(Ab-966)                           | 0.91                                    |
| ASK1(Phospho-Ser83)                    | 1.01                                    |
| ASK1(Phospho-Ser966)                   | 1.05                                    |
| BAD(Ab-112)                            | 0.95                                    |
| BAD(Ab-136)                            | 0.89                                    |
| BAD(Ab-155)                            | 1.05                                    |
| BAD(Phospho-Ser112)                    | 1.09                                    |
| BAD(Phospho-Ser136)                    | 1.08                                    |
| BAD(Phospho-Ser155)                    | 1.25                                    |
| BCL-2(Ab-56)                           | 0.82                                    |
| BCL-2(Ab-70)                           | 0.79                                    |
| BCL-2(Phospho-Ser70)                   | 1.05                                    |
| BCL-2(Phospho-Thr56)                   | 1.23                                    |
| BCL-XL(Ab-62)                          | 0.78                                    |
| BCL-XL(Phospho-Ser62)                  | 1.13                                    |
| Beta Actin                             | 0.75                                    |
| c-Jun (Phospho-Thr239)                 | 0.82                                    |
| c-Jun(Ab-170)                          | 1.11                                    |
| c-Jun(Ab-239)                          | 1.13                                    |
| c-Jun(Ab-243)                          | 1.33                                    |
| c-Jun(Ab-63)                           | 1.02                                    |
| c-Jun(Ab-73)                           | 0.94                                    |
| c-Jun(Ab-91)                           | 1.00                                    |
| c-Jun(Ab-93)                           | 0.98                                    |
| c-Jun(Phospho-Ser243)                  | 0.86                                    |
| c-Jun(Phospho-Ser63)                   | 0.66                                    |
| c-Jun(Phospho-Ser73)                   | 0.88                                    |
| c-Jun(Phospho-Thr91)                   | 0.82                                    |
| c-Jun(Phospho-Thr93)                   | 0.90                                    |
| c-Jun(Phospho-Tyr170)                  | 0.88                                    |
| c-Kit(Ab-721)                          | 0.93                                    |
| c-Kit(Phospho-Tyr721)                  | 1.01                                    |
| elF4E(Ab-209)                          | 0.91                                    |
| elF4E(Phospho-Ser209)                  | 0.82                                    |
| FAK(Ab-397)                            | 0.96                                    |
| FAK(Ab-861)                            | 1.11                                    |
| FAK(Ab-925)                            | 1.21                                    |
| FAK(Phospho-Tyr861)                    | 0.89                                    |
| FAK(Phospho-Tyr925)                    | 0.79                                    |
| FKHR(Ab-256)                           | 0.93                                    |
| FKHR(Ab-319)                           | 0.82                                    |
| FKHR(Phospho-Ser256)                   | 0.87                                    |
| FKHR(Phospho-Ser319)                   | 1.01                                    |
| FKHRL1(Ab-253)                         | 0.79                                    |
| FKHRL1(Phospho-Ser253)                 | 0.86                                    |
| Gab1(Ab-627)                           | 0.88                                    |
| Gab1(Phospho-Tyr627)                   | 1.13                                    |
| GAPDH                                  | 0.84                                    |
| GSK3 alpha(Ab-21)                      | 1.03                                    |
| GSK3 alpha(Phospho-Ser21)              | 0.87                                    |
| GSK3 beta(Ab-9)                        | 0.95                                    |
| GSK3 beta(Phospho-Ser9)                | 0.95                                    |
| IKB-alpha(Ab-32/36)                    | 1.06                                    |
| IKB-alpha(Ab-42)                       | 0.68                                    |
| IKB-alpha(Phospho-Ser32/Phospho-Ser36) | 1.09                                    |
| IKB-alpha(Phospho-Tyr42)               | 1.07                                    |
| IKK alpha(Ab-23)                       | 0.93                                    |

|                                         |      |
|-----------------------------------------|------|
| IKK alpha(Phospho-Thr23)                | 1.10 |
| IRS-1(Ab-307)                           | 1.04 |
| IRS-1(Ab-312)                           | 0.80 |
| IRS-1(Ab-636)                           | 1.01 |
| IRS-1(Ab-639)                           | 0.81 |
| IRS-1(Phospho-Ser307)                   | 1.27 |
| IRS-1(Phospho-Ser312)                   | 0.97 |
| IRS-1(Phospho-Ser636)                   | 1.33 |
| IRS-1(Phospho-Ser639)                   | 1.13 |
| JAK1(Ab-1022)                           | 0.91 |
| JAK1(Phospho-Tyr1022)                   | 0.95 |
| JAK2(Ab-1007)                           | 0.98 |
| JAK2(Ab-221)                            | 1.02 |
| JAK2(Phospho-Tyr1007)                   | 1.11 |
| JAK2(Phospho-Tyr221)                    | 1.09 |
| Met(Ab-1234)                            | 0.83 |
| Met(Ab-1349)                            | 1.07 |
| Met(Phospho-Tyr1234)                    | 1.16 |
| Met(Phospho-Tyr1349)                    | 1.07 |
| p21Cip1(Ab-145)                         | 0.85 |
| p21Cip1(Phospho-Thr145)                 | 0.89 |
| p27Kip1(Ab-10)                          | 0.98 |
| p27Kip1(Ab-187)                         | 0.89 |
| p27Kip1(Phospho-Ser10)                  | 0.91 |
| p27Kip1(Phospho-Thr187)                 | 1.35 |
| p53(Ab-15)                              | 1.11 |
| p53(Ab-18)                              | 0.98 |
| p53(Ab-315)                             | 0.90 |
| p53(Ab-33)                              | 0.89 |
| p53(Ab-37)                              | 0.83 |
| p53(Ab-46)                              | 0.78 |
| p53(Ab-6)                               | 0.97 |
| p53(Ab-9)                               | 1.10 |
| p53(Phospho-Ser15)                      | 1.02 |
| p53(Phospho-Ser315)                     | 1.24 |
| p53(Phospho-Ser33)                      | 1.15 |
| p53(Phospho-Ser37)                      | 1.06 |
| p53(Phospho-Ser46)                      | 1.05 |
| p53(Phospho-Ser6)                       | 1.00 |
| p53(Phospho-Ser9)                       | 1.63 |
| p53(Phospho-Thr18)                      | 1.09 |
| p70 S6 Kinase (Ab-424)                  | 1.01 |
| p70 S6 Kinase (Phospho-Ser424)          | 0.89 |
| p70 S6 Kinase(Ab-411)                   | 0.96 |
| p70 S6 Kinase(Phospho-Ser411)           | 1.00 |
| Paxillin(Ab-118)                        | 0.85 |
| Paxillin(Ab-31)                         | 0.91 |
| Paxillin(Phospho-Tyr118)                | 0.85 |
| Paxillin(Phospho-Tyr31)                 | 1.02 |
| PDK1(Ab-241)                            | 0.90 |
| PDK1(Phospho-Ser241)                    | 1.26 |
| PTEN(Ab-370)                            | 0.82 |
| PTEN(Ab-380)                            | 0.91 |
| PTEN(Ab-380/382/383)                    | 0.83 |
| PTEN(Phospho-Ser370)                    | 1.68 |
| PTEN(Phospho-Ser380)                    | 1.15 |
| PTEN(Phospho-Ser380/Phospho-Thr382/383) | 0.96 |
| Pyk2(Ab-402)                            | 0.99 |
| Pyk2(Phospho-Tyr402)                    | 1.00 |
| Raf1(Ab-259)                            | 1.29 |
| Raf1(Ab-338)                            | 0.95 |
| Raf1(Phospho-Ser259)                    | 1.22 |
| Raf1(Phospho-Ser338)                    | 0.95 |
| S6 Ribosomal Protein(Ab-235)            | 1.11 |
| S6 Ribosomal Protein(Phospho-Ser235)    | 2.34 |
| Zap-70(Ab-319)                          | 0.93 |
| Zap-70(Ab-493)                          | 1.07 |
| Zap-70(Phospho-Tyr319)                  | 1.14 |
| Zap-70(Phospho-Tyr493)                  | 1.03 |

|                                         |      |
|-----------------------------------------|------|
| IKK alpha(Phospho-Thr23)                | 0.95 |
| IRS-1(Ab-307)                           | 0.92 |
| IRS-1(Ab-312)                           | 0.94 |
| IRS-1(Ab-636)                           | 0.90 |
| IRS-1(Ab-639)                           | 0.68 |
| IRS-1(Phospho-Ser307)                   | 0.86 |
| IRS-1(Phospho-Ser312)                   | 0.88 |
| IRS-1(Phospho-Ser636)                   | 0.70 |
| IRS-1(Phospho-Ser639)                   | 0.86 |
| JAK1(Ab-1022)                           | 1.01 |
| JAK1(Phospho-Tyr1022)                   | 1.13 |
| JAK2(Ab-1007)                           | 1.02 |
| JAK2(Ab-221)                            | 1.12 |
| JAK2(Phospho-Tyr1007)                   | 0.97 |
| JAK2(Phospho-Tyr221)                    | 0.90 |
| Met(Ab-1234)                            | 0.97 |
| Met(Ab-1349)                            | 1.02 |
| Met(Phospho-Tyr1234)                    | 0.78 |
| Met(Phospho-Tyr1349)                    | 1.10 |
| p21Cip1(Ab-145)                         | 1.34 |
| p21Cip1(Phospho-Thr145)                 | 1.32 |
| p27Kip1(Ab-10)                          | 0.95 |
| p27Kip1(Ab-187)                         | 1.22 |
| p27Kip1(Phospho-Ser10)                  | 1.34 |
| p27Kip1(Phospho-Thr187)                 | 0.91 |
| p53(Ab-15)                              | 0.94 |
| p53(Ab-18)                              | 0.97 |
| p53(Ab-315)                             | 1.29 |
| p53(Ab-33)                              | 1.17 |
| p53(Ab-37)                              | 1.15 |
| p53(Ab-46)                              | 1.06 |
| p53(Ab-6)                               | 0.89 |
| p53(Ab-9)                               | 0.94 |
| p53(Phospho-Ser15)                      | 0.98 |
| p53(Phospho-Ser315)                     | 0.90 |
| p53(Phospho-Ser33)                      | 0.80 |
| p53(Phospho-Ser37)                      | 0.86 |
| p53(Phospho-Ser46)                      | 0.92 |
| p53(Phospho-Ser6)                       | 1.22 |
| p53(Phospho-Ser9)                       | 1.17 |
| p53(Phospho-Thr18)                      | 0.99 |
| p70 S6 Kinase (Ab-424)                  | 0.94 |
| p70 S6 Kinase (Phospho-Ser424)          | 1.01 |
| p70 S6 Kinase(Ab-411)                   | 0.99 |
| p70 S6 Kinase(Phospho-Ser411)           | 1.05 |
| Paxillin(Ab-118)                        | 1.26 |
| Paxillin(Ab-31)                         | 1.03 |
| Paxillin(Phospho-Tyr118)                | 1.52 |
| Paxillin(Phospho-Tyr31)                 | 1.04 |
| PDK1(Ab-241)                            | 0.79 |
| PDK1(Phospho-Ser241)                    | 0.76 |
| PTEN(Ab-370)                            | 1.32 |
| PTEN(Ab-380)                            | 0.98 |
| PTEN(Ab-380/382/383)                    | 1.56 |
| PTEN(Phospho-Ser370)                    | 0.88 |
| PTEN(Phospho-Ser380)                    | 0.96 |
| PTEN(Phospho-Ser380/Phospho-Thr382/383) | 0.96 |
| Pyk2(Ab-402)                            | 0.97 |
| Pyk2(Phospho-Tyr402)                    | 1.26 |
| Raf1(Ab-259)                            | 0.84 |
| Raf1(Ab-338)                            | 0.89 |
| Raf1(Phospho-Ser259)                    | 0.89 |
| Raf1(Phospho-Ser338)                    | 0.99 |
| S6 Ribosomal Protein(Ab-235)            | 0.82 |
| S6 Ribosomal Protein(Phospho-Ser235)    | 0.70 |
| Zap-70(Ab-319)                          | 1.00 |
| Zap-70(Ab-493)                          | 0.98 |
| Zap-70(Phospho-Tyr319)                  | 0.86 |
| Zap-70(Phospho-Tyr493)                  | 1.41 |
